# Supplementary material for: Structural mapping of PEAK pseudokinase interactions identifies 14-3-3 as a molecular switch for PEAK3 signaling
Source: PubMed Central journal article supplement (PMC10279719; doi:10.1038/s41467-023-38869-9), 2023-06-19
Supplement: 41467_2023_38869_MOESM3_ESM.pdf [file 41467_2023_38869_MOESM3_ESM.pdf]

## **Description of Additional Supplementary Files**

|                      |                                                                                                                                                                                                                                                                                                                                                                                                                                                                                                              |
|----------------------|--------------------------------------------------------------------------------------------------------------------------------------------------------------------------------------------------------------------------------------------------------------------------------------------------------------------------------------------------------------------------------------------------------------------------------------------------------------------------------------------------------------|
| Supplementary Data 1 | Supplementary Data Table 1: SPR-determined steady state binding affinity of PEAK pY SH2 motifs with CrkII and Grb2 (full length and SH2 domains)<br>SPR sensorgrams and fitted steady state data                                                                                                                                                                                                                                                                                                             |
| Supplementary Data 2 | Supplementary Data Table 2: SPR-determined steady state binding affinity of PEAK proline rich motif (PRM) peptides with CrkII N-SH3<br>Representative SPR sensorgrams and fitted steady state data for PEAK proline rich motif (PRM) peptides binding to immobilised CrkII N-SH3                                                                                                                                                                                                                             |
| Supplementary Data 3 | Supplementary Data Table 3: SPR-determined steady state binding affinity of PEAK tandem peptides with CrkII N-SH3<br>Representative SPR sensorgrams and fitted steady state data for PEAK proline rich motif (PRM) peptides binding to immobilised CrkII N-SH3                                                                                                                                                                                                                                               |
| Supplementary Data 4 | Supplementary Data Table 4: SPR-determined steady state binding affinity of PEAK tandem peptides with 14-3-3 isoforms<br>Representative SPR sensorgrams and fitted steady state data for PEAK tandem peptides binding to immobilised 14-3-3 isoforms                                                                                                                                                                                                                                                         |
| Supplementary Data 5 | Supplementary Data Table 5A: Summary of individual ITC binary and ternary experiments for PEAK3 tandem peptides with 14-3-3 and CrkII N-SH3<br>Supplementary Data Table 5B: Summary of mean data for ITC binary and ternary experiments for PEAK3 tandem peptides with 14-3-3 and CrkII N-SH3<br>Supplementary Data Table 5C: Summary of binary and ternary affinity of PEAK3 tandem peptides with 14-3-3 and CrkII N-SH3 determined using ITC or SPR<br>ITC data for binary and ternary binding experiments |
| Supplementary Data 6 | Supplementary Data Table 6: SPR-determined binding affinity of full length or N-terminally truncated PEAK proteins with full length interactors or sub-domains<br>SPR sensorgrams and fitted steady state data                                                                                                                                                                                                                                                                                               |
